# Supplementary material for: Assessment of Climate Biases in OpenIFS Version 43R3 across Model Horizontal Resolutions and Time Steps
Source: Copernicus journal article supplement (doi:10.5194/gmd-2023-101), 2023-07-28
Supplement: Supplementary file [file gmd-2023-101-AC1-supplement.pdf]

59 the lower stratosphere is larger in the high resolution (i.e., OIFS-HRA-15m), and the warm bias above the  
 60 stratosphere is smaller compared to the other configurations. Robert et al. (2018) noticed a similar zonal mean  
 61 temperature bias and speculated that the zonal mean temperature bias is linked with the sensitivity of spurious  
 62 mixing due to convection and diffusion.”

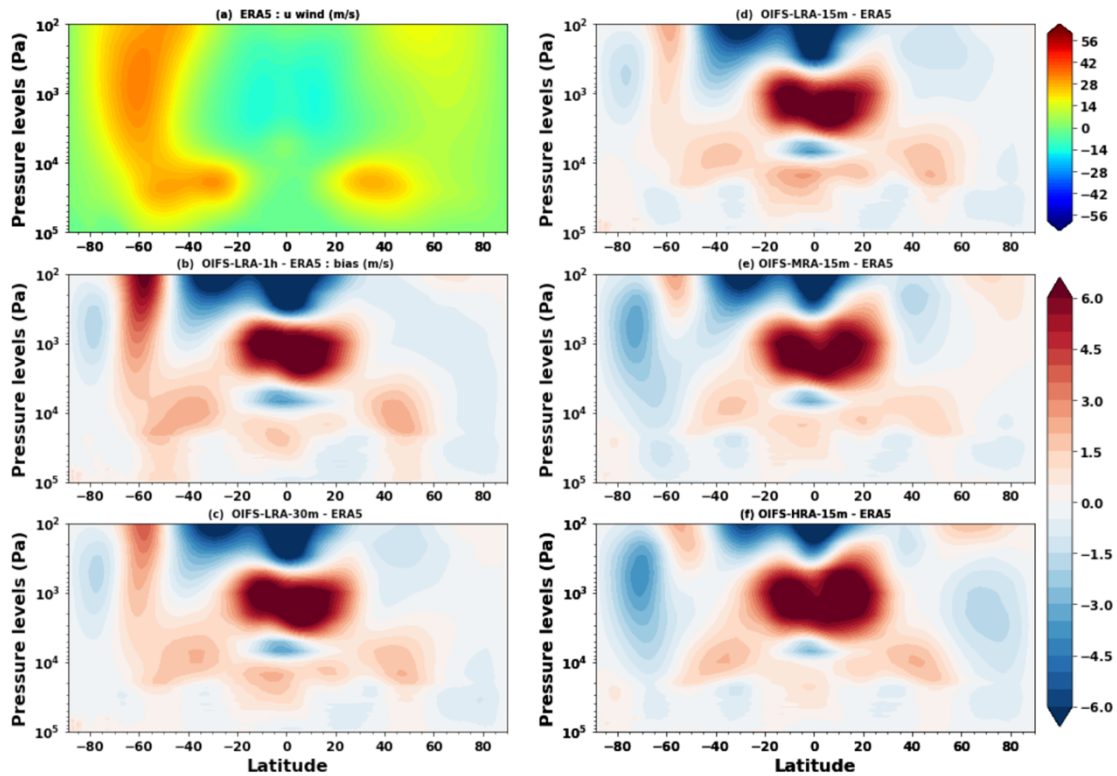

64 **Figure 4.** (a) Annual zonal mean ERA5 zonal wind [ $\text{ms}^{-1}$ ]. (b-d) Annual zonal mean zonal wind [ $\text{ms}^{-1}$ ] bias for  
 65 different model time steps (1h (b), 30m (c), and 15m (d)) using  $\sim 100$  km resolution, and (e-f) with different  
 66 horizontal resolutions,  $\sim 50$  (e) and  $\sim 25$  km (f), respectively. Biases are computed with respect to ERA5 over the  
 67 period 1979–2019.

68  
 69  
 70 (2) The abstract concludes with the general statement that "reducing the time step in the OpenIFS model, one  
 71 can alleviate some climate biases at a lower cost than by increasing the horizontal resolution." I would like the  
 72 authors to add some discussion of whether they expect their results to generalise to resolutions and/or time-  
 73 steps not tested in this manuscript. For example, how far is the LR configuration from converging? Would  
 74 reducing time-step in a much higher resolution model (e.g. 9km) bring similar benefits? Depending on these  
 75 additions, the authors may wish to qualify the concluding line of the abstract.

76 As suggested by the reviewer, we have modified the general conclusion to more specific as (lines 28-29):  
 77 “Reducing the time step in the coarse resolution ( $\sim 100$  km) OpenIFS model, one can alleviate some climate  
 78 biases at a lower cost than by increasing the horizontal resolution.”

79  
 80 (3) What is the impact time-step/resolution on the representation of extremes? It is plausible that changes in  
 81 time-step that improve the mean state have a limited impact on extremes that are more sensitive to horizontal  
 82 resolution (e.g. orographic precipitation or tropical cyclones). As cited by the authors, the mean climate of the  
 83 25km and 50 km HighResMIP configurations of IFS are very similar. However, the differences in horizontal  
 84 resolution are evident in the representation of extremes (examples below):

85 <https://agupubs.onlinelibrary.wiley.com/doi/full/10.1029/2019JD032184>

86 Bador et al. (2020)

87 <https://journals.ametsoc.org/view/journals/clim/33/7/jcli-d-19-0639.1.xml>

88 Roberts J. et al (2020)

89 This is an excellent point. However, the main focus in this study is the mean state biases. The OpenIFS’ model  
 90 time-step sensitivity to extremes will be discussed in detail in a separate manuscript.

91

92 **Minor comments:**

93 Introduction: This section would benefit from an overview of the "expected" impacts of reducing time-step in  
94 simple models in terms of truncation error and how this might not always hold true in a more complex system.  
95 For example, in simple finite difference models, solutions converge as grid-spacing and time-step are decreased  
96 due to reduced truncation errors. The choice of time-step and grid-spacing may also be constrained by stability  
97 criteria. However, this intuition does not always hold in complex models due to the coupling between many  
98 different elements. For instance, it is plausible that the unconditionally stable semi-implicit semi-Lagrangian  
99 scheme used in the IFS allows a user to configure the model with a long time step to reduce the cost. Later  
100 developments on top of this configuration introduce compensating errors in other aspects of the physics that  
101 reduce biases. Reducing the time step at a later stage may then leads to increased biases as the model  
102 configuration has been implicitly tuned for a particular combination of time-step and resolution.

103 We added some text to the Introduction section (see below) (lines 75-82):

104 “While the semi-implicit semi-Lagrangian scheme, as used in OpenIFS, is unconditionally stable and the time  
105 step can be chosen to be very long, a shorter time step generally leads to a decrease in truncation error in the  
106 finite differences and thus a more accurate representation of the model dynamics. The physics  
107 parameterisations, which are computed independently of each other in OpenIFS, also benefit from a shorter time  
108 step as it will allow the various parameterisations to be coupled at a higher frequency (Beljaars et al. 2018).  
109 However, model parameters for e.g., convection or diffusion may be tuned for a specific time step and  
110 shortening the time step can therefore, in some cases, increase model error. Hence, a shorter model time step is  
111 expected to reduce biases in model dynamics, e.g., winds, while the results for parameterised processes, e.g.,  
112 precipitation, may be mixed”.

113  
114 Lines 110-119. The authors state that their "detailed analysis of phase speed in such a manner is novel in  
115 literature". This may be the case, but I would like the authors to provide a more detailed summary of the method  
116 used to diagnose the amplitude and phase speed of extratropical Rossby waves (e.g. a bullet point list of the  
117 main processing steps). The current description is insufficient for reproduction of the analysis. In particular, it is  
118 not clear from the text how wave packets and associated phase speeds are diagnosed.

119 We revised the texts so that we can reproduce the analysis by following the steps (lines 132-137)

120 “We then applied the Fourier decomposition analysis to determine amplitude and position for each Rossby wave  
121 number at each latitude as a function of time. Phase speed is computed as the difference in the daily position of  
122 each wave, and stored at the midpoints in the time dimension. For consistency, wave amplitudes are interpolated  
123 to the midpoints in time as well. Lastly, seasonal averages are computed from the daily data for the boreal and  
124 austral winter seasons over the time period 1979–2019. In the case of phase speed, it is weighed by the  
125 corresponding daily (midpoint) amplitude squared when computing the seasonal averages in order to account for  
126 the impact of higher-amplitude events.”

127  
128 Line 169. Typo? Should be "Roberts et al. (2018)" as in intro?

129 This has been fixed.

130

131 Line 198. Is it correct to include Coriolis? Work done by Coriolis term should be zero since it acts perpendicular  
132 to motion of air parcels.

133

134 Yes, the Coriolis term is included in the DYN part because we are analyzing zonal wind tendency. However, we  
135 have not quantified the individual contribution of the Coriolis term to the DYN term.

136

137 Lines 226-228: It is possible that the lower precipitation RMSE in OIFS-LRA-1h is due to a "double penalty"  
138 effect that penalises higher resolution models, which have more structure in the precipitation fields. Is the  
139 precipitation in the LR-1h experiment notably smoother? Other metrics (e.g. fractions skill score) may provide a  
140 different ranking of models. More details on double-penalty effects and fraction skill score here:

141 <https://www.ecmwf.int/en/about/media-centre/science-blog/2023/verifying-high-resolution-forecasts>

142

143 To verify our result, we computed the RMSE by smoothing the data and found a similar conclusion. However,  
144 the RMSE values differ in magnitude if we compare them with without smoothing. We have not computed the  
145 fraction skill score as our conclusions are insensitive to the double penalty effect (see the figure below; (left)  
146 RMSE and (right) time mean Precipitation). We now added this information in the main text as well (lines 259-  
147 263).

148 “We have computed the SAT and precipitation biases with a 3-point smoothing, i.e., approximately 3x3 degree  
149 spatial smoothing, which eliminates the wiggles near steep topography arising from the Gibbs’ phenomenon in  
150 the model spectral fields. We find that smoothing the fields does not change the main result that precipitation

151 biases increase with shorter time step in Tco95 and then decreases somewhat with higher horizontal resolution.  
 152 Hence, the wiggles are not the main source of precipitation biases and their presence does not impact the  
 153 findings in this study.”  
 154  
 155

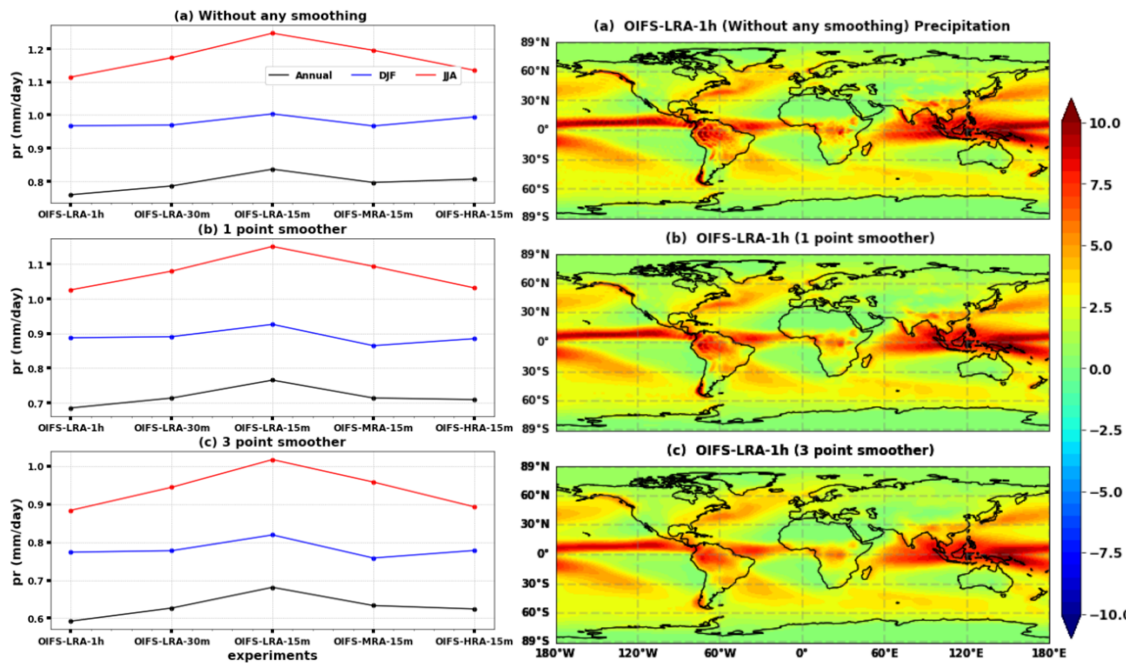

156  
 157  
 158  
 159 Lines 237-238 and figure 4: Why do the authors standardise the wave amplitude biases in figure 4 instead of  
 160 showing the absolute values? This standardisation emphasises errors in regions the authors argue are  
 161 unimportant, which complicates interpretation of the plots. Specifically, the authors focus their analysis of  
 162 Rossby waves on the "region where the wave amplitude is larger than 5 ms-1 is termed core region, which  
 163 mostly covers the area that is occupied by the thick black contours in Fig. 4". However, biases are presented  
 164 "relative to ERA5 (model – ERA5), normalized by the ERA5 detrended variability expressed by the standard  
 165 deviation", which highlights errors in the high-latitude high-wavenumber waves that are dismissed by the  
 166 authors as "unimportant as these waves have a small amplitude and little effect on variability".  
 167 We updated the figures with absolute error and modified the texts accordingly (pages 9-10 and also provided  
 168 texts below).  
 169



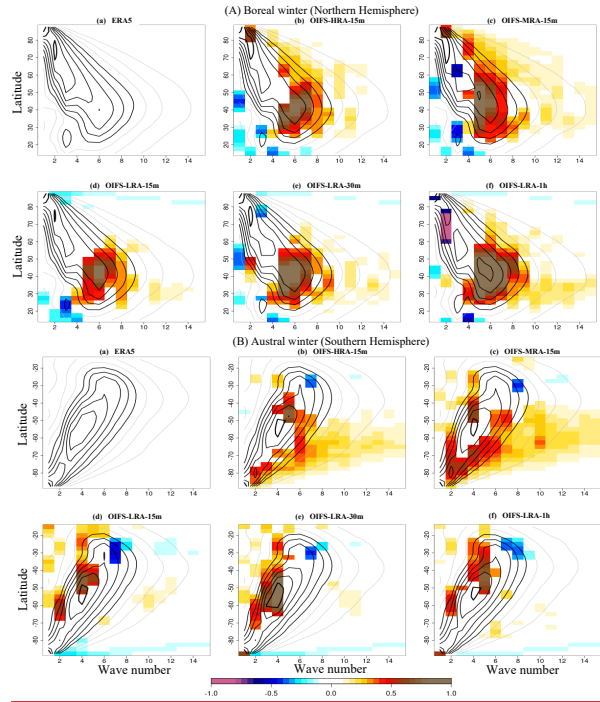

170  
171  
172  
173  
174  
175  
176  
177  
178

**Figure 5.** (A) The Rossby wave amplitude (contours) for different wave numbers in the Northern Hemisphere at 300 hPa (a) in ERA5 observation and (b-f) in the OIFS model simulations during 1979-2019 in DJF (i.e., boreal winter). The color shows difference of wave amplitude between the model and ERA5 where it is significant on the 95 % confidence level. The wave amplitude and contour interval are shown in  $\text{ms}^{-1}$ . The grey contours start from  $2 \text{ ms}^{-1}$  and the black contours from  $5 \text{ ms}^{-1}$  and the contour interval is  $1 \text{ ms}^{-1}$ . (B) is similar to (A), but for JJA (i.e., austral winter).

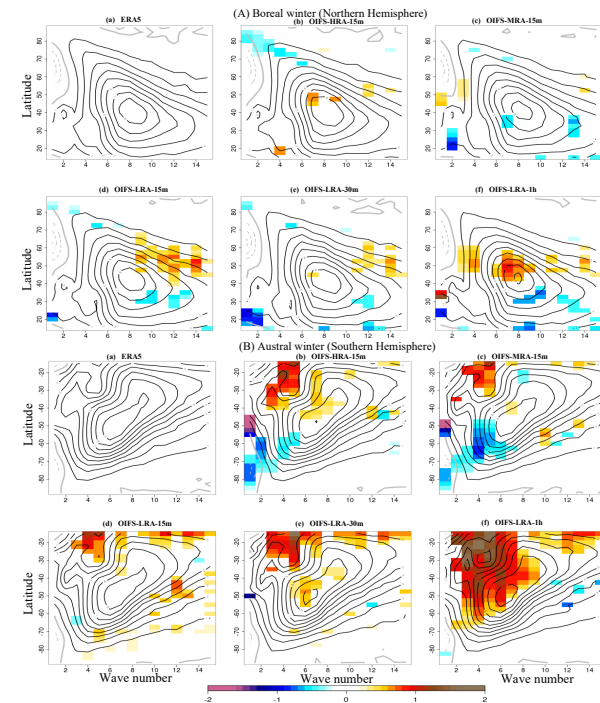

179  
180  
181  
182  
183  
184  
185

**Figure 6.** (A) The Rossby wave phase speed (contours) for different wave numbers at 300 hPa in the Northern Hemisphere in ERA5 (a) observation and (b-f) in the OIFS model simulations during 1979-2019 in DJF (i.e., boreal winter). The color shows the difference of wave phase speed between model and ERA5 where it is significant on the 95 % confidence level. The wave phase speed and contour interval are shown in  $\text{ms}^{-1}$ . The black

186 contours start from  $1 \text{ ms}^{-1}$  and the contour interval is  $1 \text{ ms}^{-1}$ . Panel (B) is similar to panel (A), but for JJA (i.e.,  
187 austral winter). The dashed contours show a negative phase speed and a grey contour shows a zero-phase speed.  
188  
189  
190

191 “Fig. 5 shows the Rossby wave amplitude (gray and black contours) for ERA5 and the individual OIFS  
192 simulations for the boreal winter (Fig. 5A, DJF, Northern Hemisphere; NH) and austral winter (Fig. 5B, JJA,  
193 Southern Hemisphere; SH). The color in Fig. 5 denotes the wave amplitude bias relative to ERA5 (model –  
194 ERA5). We focus only on those wave numbers and latitudes that have the highest wave amplitude, because these  
195 waves explain most of the variability. The region where the wave amplitude is larger than  $5 \text{ ms}^{-1}$  is termed “core  
196 region”, which mostly covers the area that is occupied by the thick black contours in Fig. 5. In DJF (NH), at north  
197 of  $70^\circ \text{ N}$ , the Rossby wave numbers  $k=1$  and  $k=2$  have the largest amplitude in ERA5 whereas at the mid-latitudes  
198 ( $30^\circ \text{ N}$  to  $60^\circ \text{ N}$ ), the wave numbers between about  $k=3$  and  $k=9$  have large amplitude with the largest amplitude  
199 amounting to  $8 \text{ ms}^{-1}$  at about  $40^\circ \text{ N}$  for the wave number  $k=6$  (Fig. 5Aa). During JJA (SH), the wave amplitude is  
200 located in a similar core region (Fig. 5Ba) as that in DJF (NH). The amplitude is largest south of  $70^\circ \text{ S}$  for the  
201 wave numbers  $k=1$  and  $k=2$  whereas at the mid-latitudes ( $45^\circ \text{ S}$  to  $65^\circ \text{ S}$ ), the wave numbers between about  $k=3$   
202 to 5 have large amplitude with the largest amplitude amounting to  $9 \text{ ms}^{-1}$  is found at  $57.5^\circ \text{ S}$  for the wave number  
203  $k=4$  (Fig. 5Ba).  
204

205 In DJF (NH) the OIFS-LRA-1h configuration exhibits a positive bias of  $\sim 1 \text{ ms}^{-1}$  in Rossby wave amplitude (i.e.,  
206 the waves amplitude bias in OIFS-LRA-1h is larger than the ERA-5) in the core region, in particular for wave  
207 numbers  $k=3-8$  at latitudes between  $25^\circ \text{ N}$  to  $55^\circ \text{ N}$  and a negative bias at latitudes between  $60^\circ \text{ N}$  to  $80^\circ \text{ N}$  for  
208 waver number 2 (Fig. 5Af). The wave amplitude biases around the core region in OIFS-LRA-1h in the  
209 midlatitudes ( $20^\circ \text{ N}$  to  $40^\circ \text{ N}$ ) are small ( $\sim 0.2$ ) for the higher wave numbers and get better with a shorter time step  
210 configuration (OIFS-LRA-15m).  
211

212 The Rossby wave amplitude biases in the OIFS-HRA-15m configuration are strongly reduced compared to the  
213 OIFS-LRA-1h configuration over the core region (Fig. 5Ab and 5Af). The Rossby wave amplitude bias reduction  
214 in the OIFS-MRA-15m configuration is mostly similar to that in the OIFS-HRA-15m configuration except for the  
215 wave number  $k=7$  at  $45^\circ \text{ N}$ , where the wave amplitude bias is larger in the OIFS-HRA-15m configuration (Fig.  
216 5Ab and 5Ac). The OIFS-HRA-15 m and OIFS-MRA-15m configurations also exhibit a positive bias for wave  
217 number 2 at high-latitudes  $60^\circ \text{ N}$  to  $80^\circ \text{ N}$ . The OIFS-MRA-15m configuration also show a negative bias for the  
218 wave number 3 at latitudes between  $60^\circ \text{ N}$  to  $65^\circ \text{ N}$  in the core region, which is not present in the other  
219 configurations. The OIFS-HRA-15m and OIFS-MRA-15m configurations show similar bias around the core  
220 region as in the OIFS-LRA-1h configuration, i.e., high resolution and OIFS-LRA-1h configurations overestimate  
221 wave amplitudes for the higher wave numbers. The Rossby wave amplitude biases are progressively reduced from  
222 the OIFS-LRA-1h configuration to the OIFS-LRA-30m and OIFS-LRA-15m configurations (Fig. 5Ad-Af),  
223 indicating a sensitivity of model bias to the time step. The wave amplitude bias for wave number  $k=7$  at  $45^\circ \text{ N}$   
224 exists in all the configurations, and it is smaller in the OIFS-LRA-15m and OIFS-MRA-15m configuration than  
225 in the other configurations. Overall, both OIFS-LRA-15m and OIFS-HRA-15m configurations are able to  
226 reproduce the observed Rossby-wave amplitudes in DJF (NH) better than OIFS-LRA-1h.  
227

228 In JJA (SH), the Rossby wave amplitude bias in the core region is smaller than in DJF (NH) for all the  
229 configurations (Fig. 5A and 5B). OIFS-LRA-1h exhibits a positive bias of  $\sim 0.5 \text{ ms}^{-1}$  in JJA (SH) for the wave  
230 number  $k=2$  at latitude between  $\sim 50^\circ \text{ S}$  and  $\sim 62.5^\circ \text{ S}$  and for wave numbers  $k=4$  to 5 between  $30^\circ \text{ S}$  and  $40^\circ \text{ S}$   
231 (Fig. 5Bf). The OIFS-LRA-30m configuration shows a positive bias for the wave number  $k=2$  to 5 at latitudes  
232 between  $40^\circ \text{ S}$  and  $70^\circ \text{ S}$ , which is larger than other configurations.

233 The OIFS-HRA-15m and OIFS-MRA-15m configurations exhibits a positive bias  $\sim 0.5 \text{ ms}^{-1}$  around the core  
234 region and latitude  $50^\circ \text{ S}$  to  $70^\circ \text{ S}$ , which does not exist in the other coarse resolution configurations (Fig. 5Bb-  
235 Bf). The Rossby wave amplitude biases around the core region at the midlatitudes in the high-resolution  
236 simulations are consistent and large in the SH than the NH (Fig. 5Ab-c and 5Bb-c).  
237

238 We also analyze the phase speed of Rossby waves for ERA5 and across the OIFS' configurations for DJF (NH)  
239 and JJA (SH) seasons (Fig. 6). In the ERA5 dataset (Fig. 6Aa), the Rossby wave phase speed is positive (i.e.,  
240 eastward moving, solid contour) for wave numbers greater than 2 (i.e.,  $k>2$ ) at most latitudes. The wave numbers  
241  $k=1$  to 2 have a positive wave phase speed from the equator to  $55^\circ \text{ N}$  and a negative wave phase speed (i.e.,  
242 westward moving, dashed contours) between  $60^\circ \text{ N}$  and  $80^\circ \text{ N}$  in DJF (NH) (Fig. 6Aa). The maximum phase  
243 speed is found at wave number  $k=8$  at  $40^\circ \text{ N}$ , while the minimum is found at wave number  $k=1$  at  $60^\circ \text{ N}$  (Fig.  
244 6Aa). In JJA (SH) (Fig. 6Ba), the wave phase speeds are mostly positive and large for all the wave numbers and

245 at each latitude, with the maximum phase speed is observed for the wave numbers between  $k=6$  and  $k=8$  and  
 246 latitudes between  $40^\circ$  S and  $60^\circ$  S, and these waves are moving faster than that in DJF (NH).  
 247

248 The OIFS-LRA-1h configuration suffers from positive phase speed bias for wave numbers  $k=4$  to  $8$  at latitudes  
 249 between  $42.5^\circ$  N and  $60^\circ$  N, i.e., waves move faster eastward than in ERA5, and the bias is larger than  $1 \text{ ms}^{-1}$ . The  
 250 bias of  $\sim 1 \text{ ms}^{-1}$  for wave number  $k = 6$  to  $8$  at  $40^\circ$  N and  $60^\circ$  N is of particular concern as it is near the maximum  
 251 wave amplitudes in DJF (Fig. 6Af). In general, phase speed biases in the OIFS-LRA-1h configuration are strongly  
 252 reduced as either horizontal resolution is increased or time step is shortened (Fig. 6Ab-5Af). In JJA (SH), the  
 253 OIFS-LRA-1h configuration exhibits a very large (between  $\sim 1.5$ - $2 \text{ ms}^{-1}$ ) Rossby wave phase speed bias for most  
 254 of the wave numbers, which is largest for the wave numbers  $k=2$  to  $8$  between  $15^\circ$  S to  $55^\circ$  S (Fig. 6Bf). Large  
 255 biases can be found between  $15^\circ$  S and  $25^\circ$  S ( $\sim 1.5 \text{ ms}^{-1}$ ) for most of the wave numbers, but the wave activity is  
 256 low there (Fig. 6Bf). The large phase speed biases are strongly reduced in the OIFS-LRA-30m and OIFS-LRA-  
 257 15m configurations (Fig. 6Bd-Bf), indicating a strong sensitivity to the reduced biases in mean winds and wind  
 258 speeds (Fig. 1). Overall, the Rossby wave speed bias in the OIFS-HRA-15m configuration is smaller than in the  
 259 OIFS-LRA-1h configuration (Fig. 6Bb and 6Bf). However, we note that both the OIFS-MRA-15m and OIFS-  
 260 HRA-15m configurations exhibit negative biases south of  $55^\circ$  S for wave numbers  $k= 1$  to  $5$ , that is, the eastward  
 261 moving waves are slower than in the ERA5 (Fig. 6Bb).  
 262

263 The wave phase speed analysis reveals a clear improvement in the representation of the Rossby waves in the  
 264 boreal winter (i.e., NH) when increasing the horizontal resolution and shortening the model time step compared  
 265 to OIFS-LRA-1h configuration. In austral winter, however, the representation of Rossby wave amplitudes and  
 266 phase speeds are the most realistic in OIFS-LRA-15m configuration, with longer time steps introducing too fast  
 267 phase speeds and higher horizontal resolution introducing too slow phase speeds at wave number less than  $6$  (i.e.,  
 268  $k < 6$ ).”  
 269

270 Section 3.2. How do the authors interpret the impact on Rossby wave amplitude/phase speed biases? For  
 271 example, is it related to the representation of tropospheric jets and associated wave guides and their biases?  
 272 The representation of tropospheric jets and associated wave guides can be related to biases in Rossby wave  
 273 packets ( e.g., Giannakaki and Martius, (2016), Hakim, 2005 and Baumgart et al., 2018). We evaluate the  
 274 amplitude and speed of each wavenumber individually that indicating at which scale the model biases occur.  
 275 RWPs are then the combination (or sum) of the intermediate ones (e.g. wavenumbers 4-15), but  
 276 diagnosing/tracking RWPs is a different analysis, and there's no consensus on the best method (Wolf and Wirth,  
 277 2017).  
 278

279 Section 3.3 and figure 7. What is the sampling uncertainty in these composites and estimates of pattern  
 280 correlation (e.g. estimated using bootstrap resampling of available dates)? Are the differences between  
 281 configurations significant?

282 We added sampling uncertainty using bootstrapping method with random 2000 iterations.

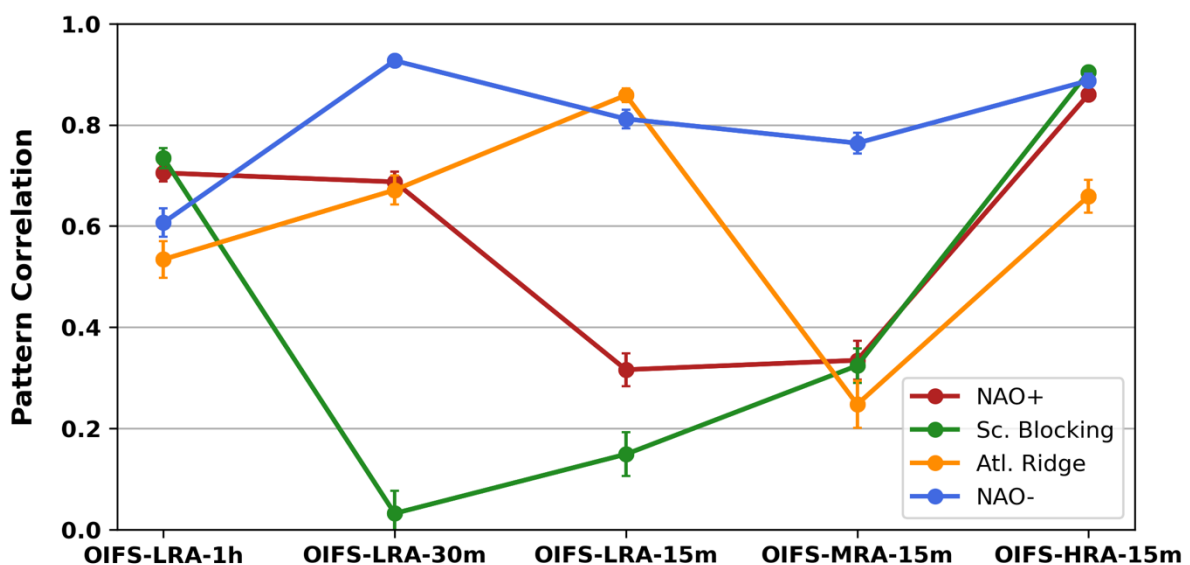

283 Figure. 8. Pattern correlation coefficient of the individual weather regime between OIFS model configurations  
 284 and ERA5 for the period 1979-2019 for the DJF season. The error bars represent a 95% confidence interval.  
 285  
 286

287 Table 1. What is the HPC cost of the different configurations (e.g. core hours per model year)? Do they scale as  
 288 expected from changes in time-step and number of grid points?  
 289 As the reviewer suggested, we added this information to Table 1 (lines 694-698).  
 290

291 Figure 2. What is the sampling uncertainty in these estimates of RMSE? Are the differences in RMSE between  
 292 configurations significant?  
 293 We added the figure depicting RMSE with sampling uncertainty using bootstrapping method with random 2000  
 294 iterations (see below and page 22).  
 295

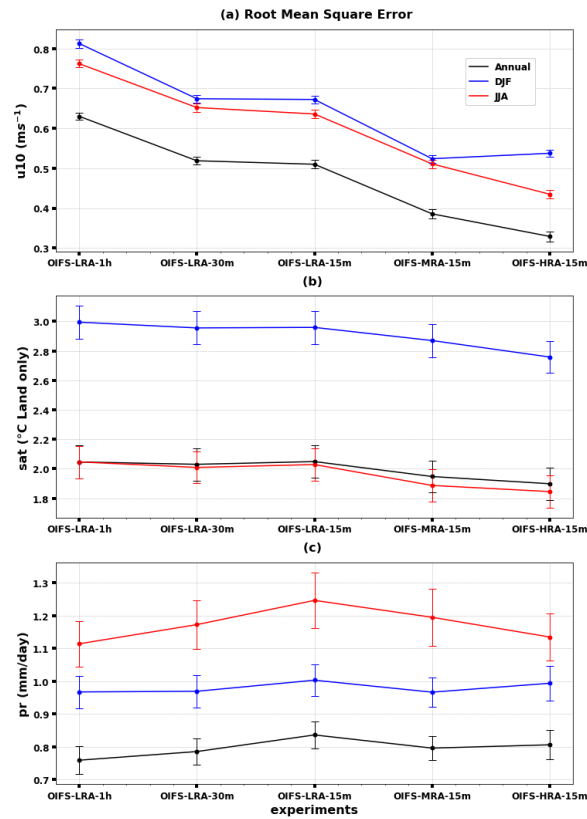

296 Figure 2. Root mean squared error of surface zonal wind (a), SAT (b), and precipitation (c) over the period 1979-  
 297 2019 for all the configurations: annual (black) and seasonal mean (DJF: blue, JJA: red). The error bars represent  
 298 a 95% confidence interval.  
 299
